# Supplementary material for: The Relationship between Type D Personality and the Stress Level of Life Events, Personality Traits and Anxiety Sensitivity in People with Breast Cancer
Source: Preprints.org preprint supplement (doi:10.20944/preprints202007.0063.v1), 2020-07-05
Supplement: Supplementary file 1 [file supplementary]

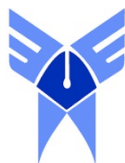

Islamic Azad University

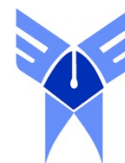

Tehran Islamic Azad University Of  
Medical Sciences

## Research Ethics Certificate

|                      |                                                                                                                                                                                                                                                                                                                                                                                                                                                                                                                                                                                                                                   |                |            |
|----------------------|-----------------------------------------------------------------------------------------------------------------------------------------------------------------------------------------------------------------------------------------------------------------------------------------------------------------------------------------------------------------------------------------------------------------------------------------------------------------------------------------------------------------------------------------------------------------------------------------------------------------------------------|----------------|------------|
| Approval ID:         | IR.IAU.TMU.REC.1397.099                                                                                                                                                                                                                                                                                                                                                                                                                                                                                                                                                                                                           | Approval Date: | 2018-09-03 |
| Evaluated by:        | Tehran Islamic Azad University Of Medical Sciences                                                                                                                                                                                                                                                                                                                                                                                                                                                                                                                                                                                |                |            |
| Status:              | Approved                                                                                                                                                                                                                                                                                                                                                                                                                                                                                                                                                                                                                          |                |            |
| Approval Statement:  | <p>The project was found to be in accordance to the ethical principles and the national norms and standards for conducting Medical Research in Iran.</p> <p>Notice:</p> <ol style="list-style-type: none"> <li>1. Although the proposal has been approved by the research ethics committee, meeting the professional and legal requirements is the sole responsibility of the PI and other project collaborators.</li> <li>2. This certificate is reliant on the proposal/documents received by this committee on 2018-09-03. The committee must be notified by the PI as soon as the proposal/documents are modified.</li> </ol> |                |            |
| Thesis Title:        | The relationship between type D with the stress levels of life events, personality features and anxiety sensitivity in patients with breast cancer in buali hospital at Tehran in 1397                                                                                                                                                                                                                                                                                                                                                                                                                                            |                |            |
| Thesis Adviser (PI): | Name: Abdolmajid Bahrainian<br>Email: majid.bahrainian@gmail.com                                                                                                                                                                                                                                                                                                                                                                                                                                                                                                                                                                  |                |            |
| Student:             | Name: Atena Pasha<br>Email: atena.pasha@yahoo.com                                                                                                                                                                                                                                                                                                                                                                                                                                                                                                                                                                                 |                |            |

  
Dr. Seyed Ali Abtahi

Director of Institutional Research Ethics Committee  
Tehran Islamic Azad University Of Medical Sciences

  
Dr. Mirmasoudfatemi

Secretary of Institutional Research Ethics Committee  
Tehran Islamic Azad University Of Medical Sciences
